# Supplementary material
Source: PubMed Central journal article supplement (PMC10592503)
Supplement: NIHMS1909734-supplement-Supplemental_Digital_Content_2.pdf [file NIHMS1909734-supplement-Supplemental_Digital_Content_2.pdf]

## Appendix 1. Study recruitment and enrollment summary.

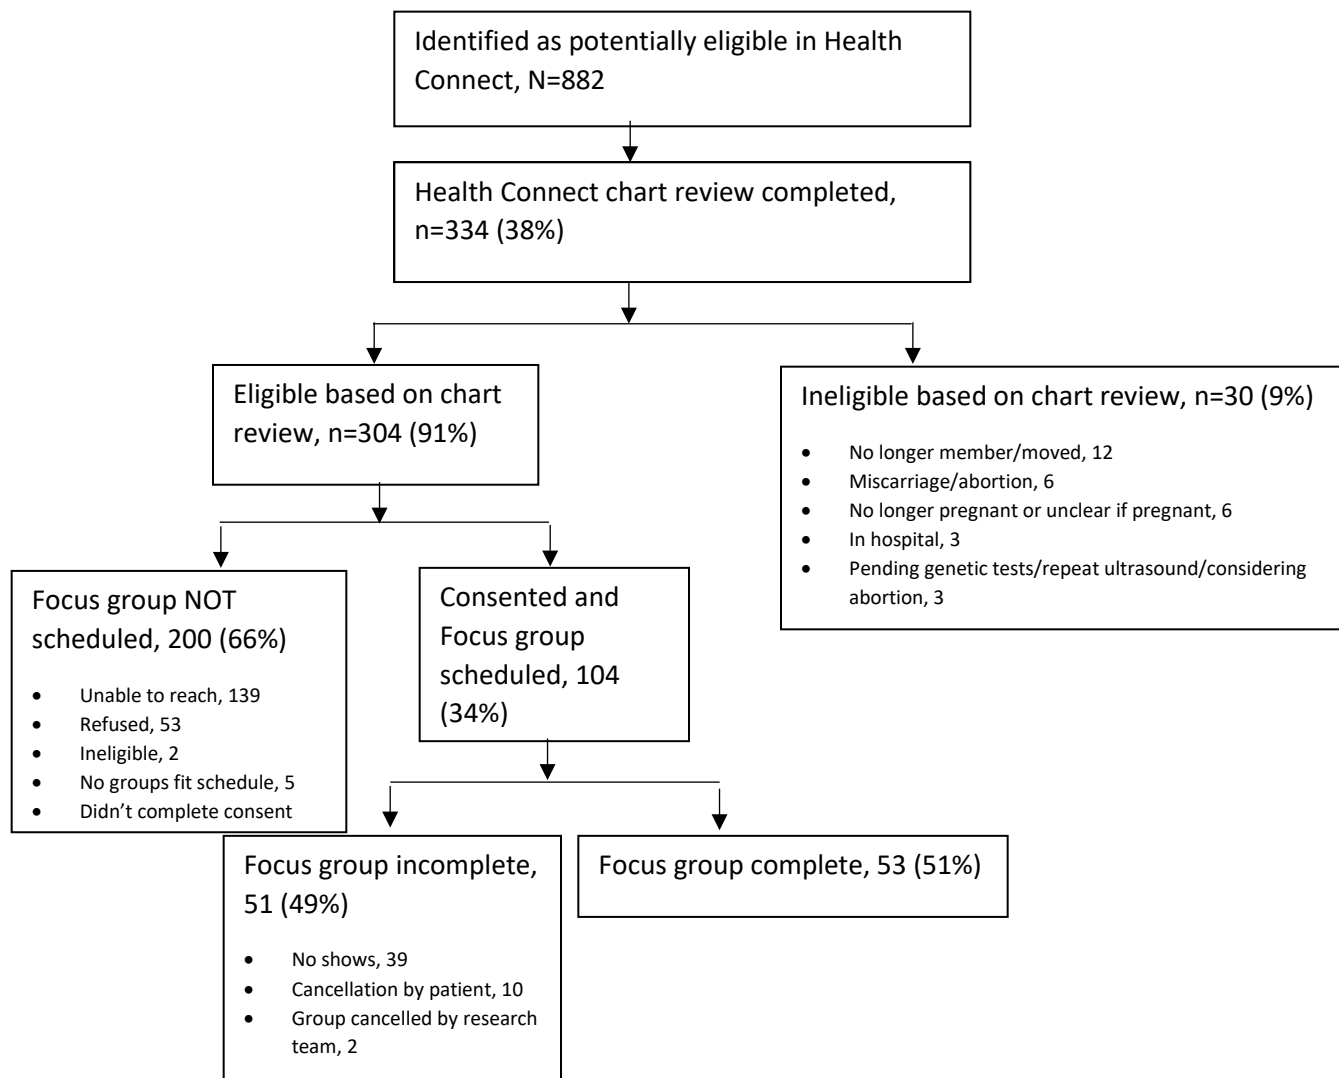

Foti TR, Green A, Altschuler A, Iturralde E, Does MB, Jackson-Morris MB, et al. Patient perceptions of prenatal cannabis use and implications for clinicians. *Obstet Gynecol* 2023;142.

The authors provided this information as a supplement to their article.

©2023 American College of Obstetricians and Gynecologists.
